# Supplementary material
Source: PubMed Central journal article supplement (PMC3734570)

CDK

### Activated K-Ras to Wild-Type Control Comparison

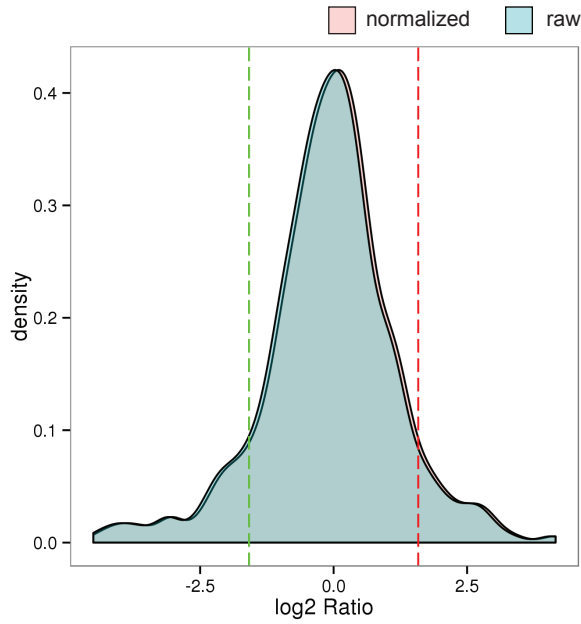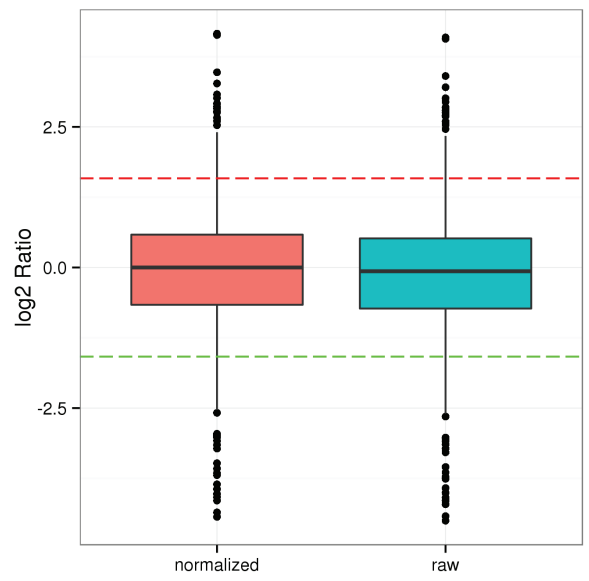

### Activated Cdc42 to Wild-Type Control Comparison

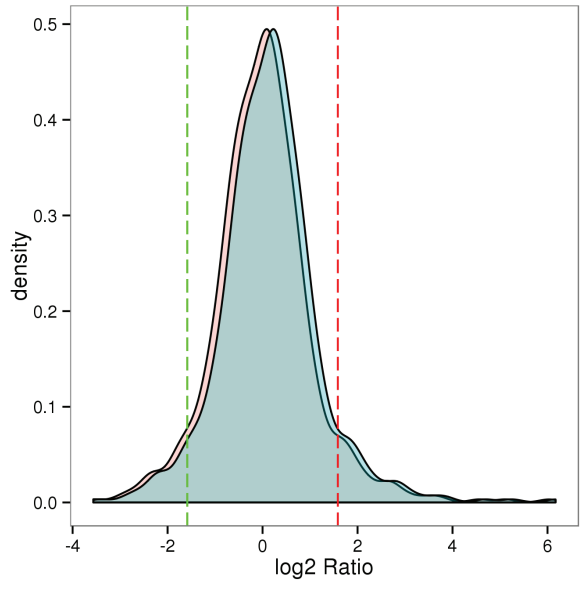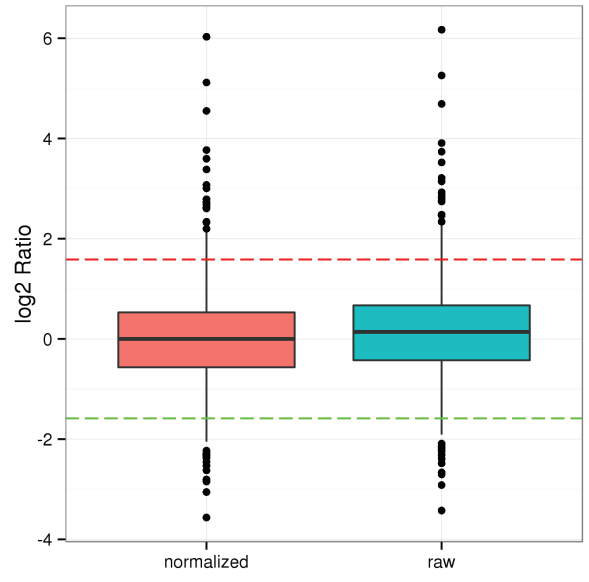

### PAK4 Knockout to Wild-Type Control Comparison

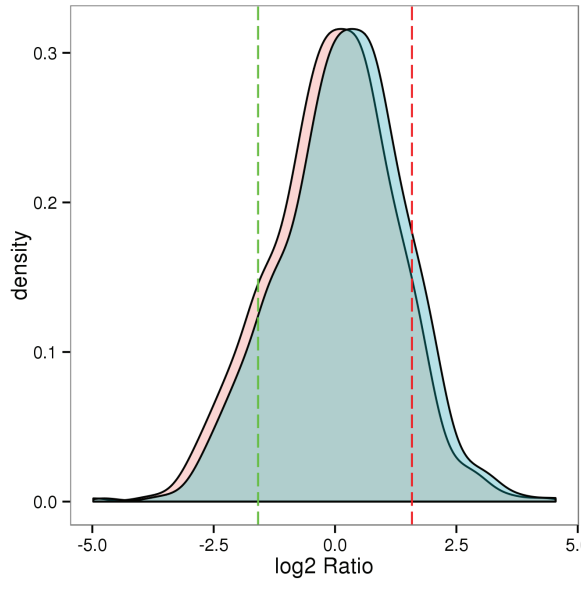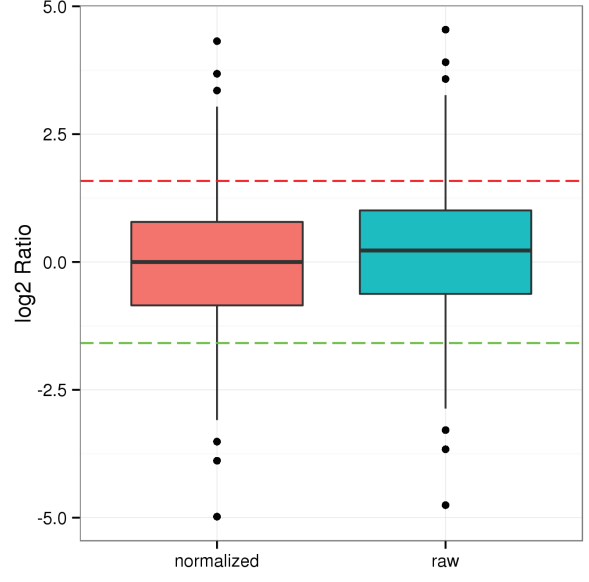

CK

### Activated K-Ras to Wild-Type Control Comparison

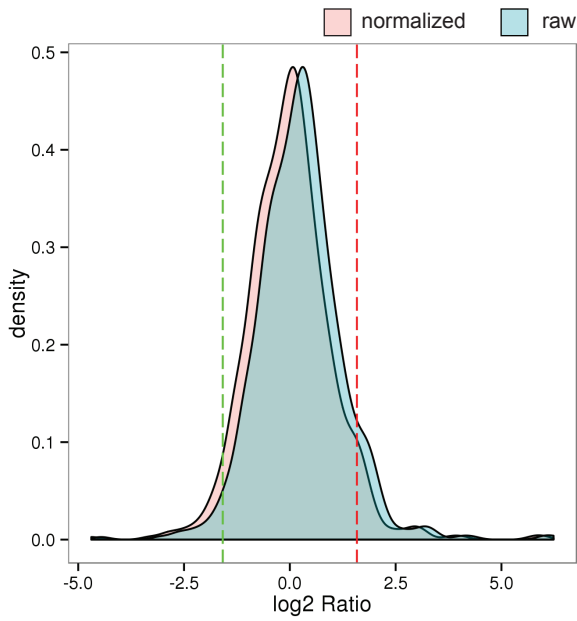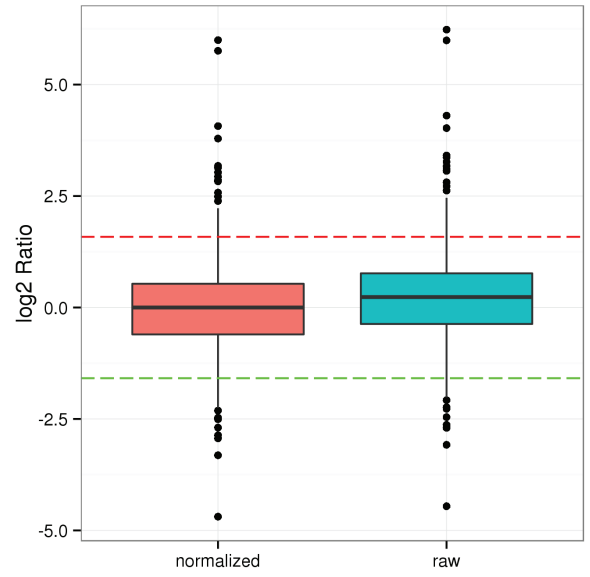

### Activated Cdc42 to Wild-Type Control Comparison

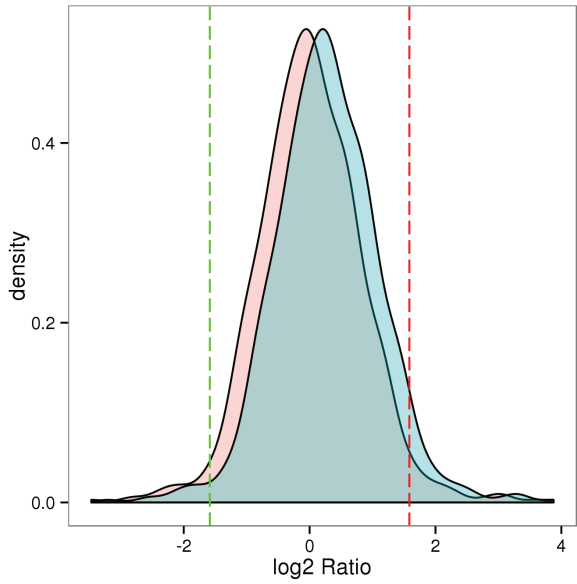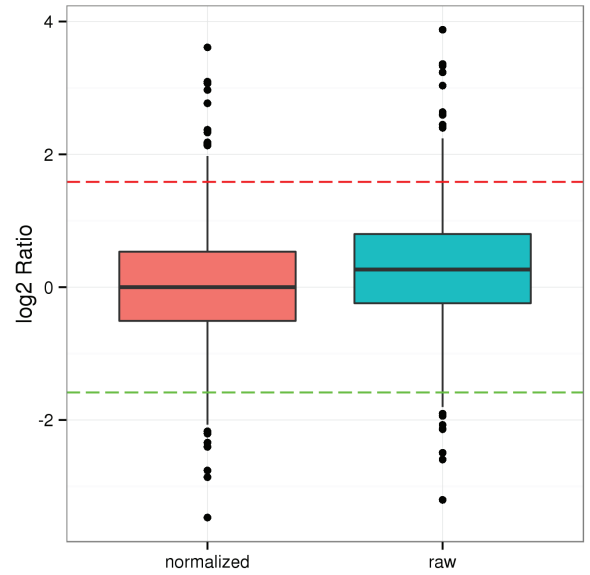

### PAK4 Knockout to Wild-Type Control Comparison

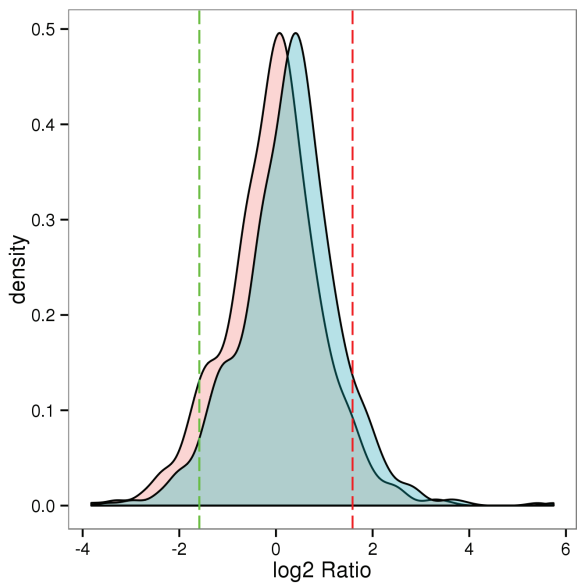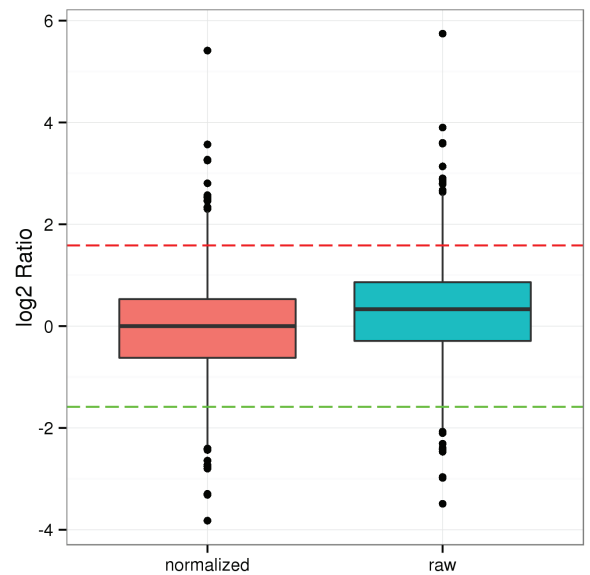

PKD

### Activated K-Ras to Wild-Type Control Comparison

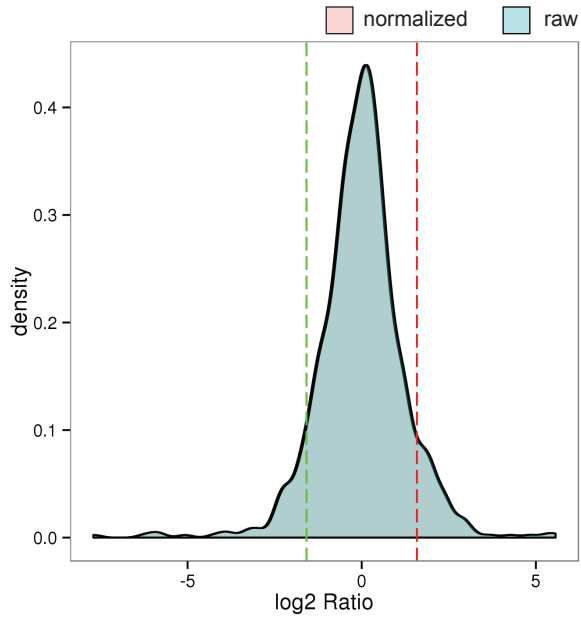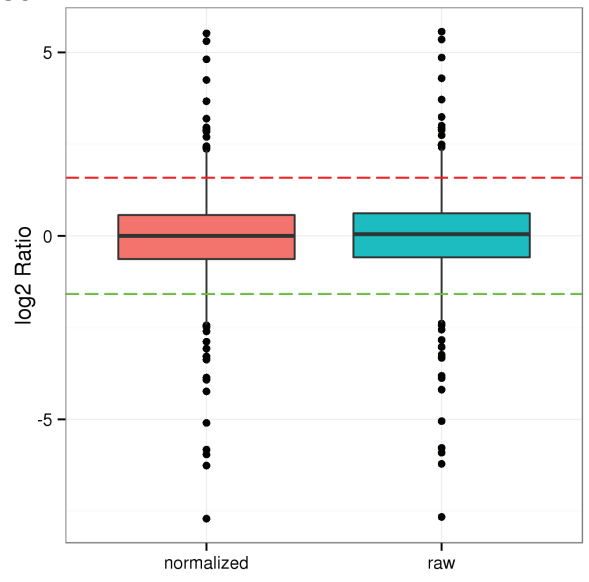

### Activated Cdc42 to Wild-Type Control Comparison

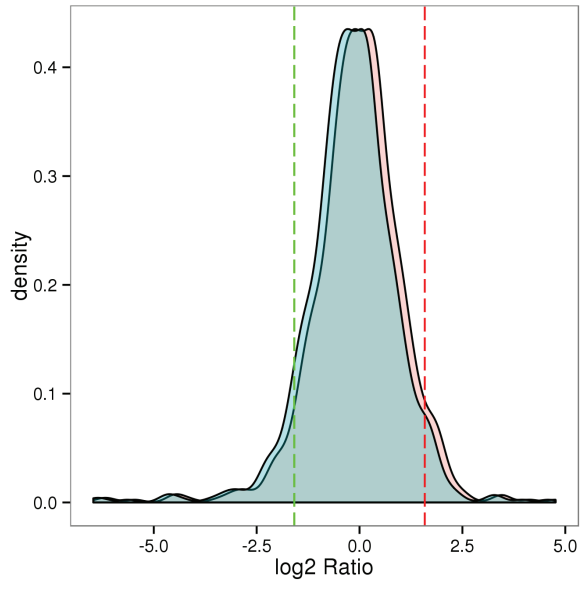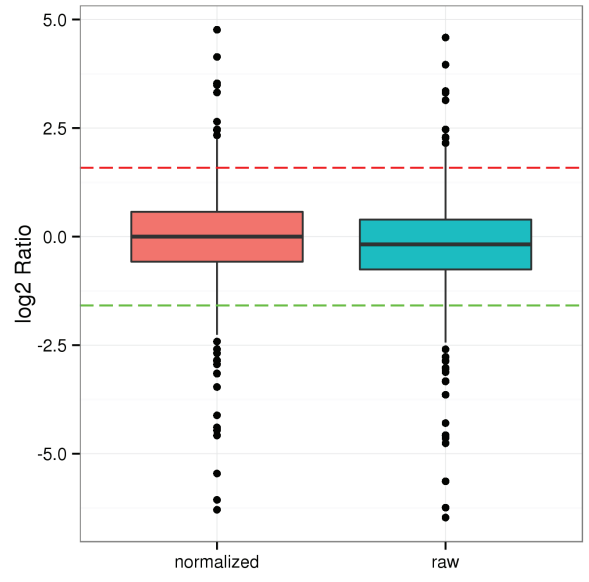

### PAK4 Knockout to Wild-Type Control Comparison

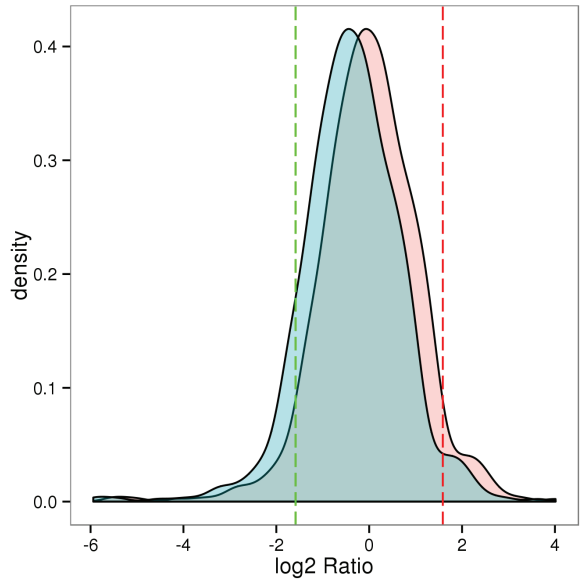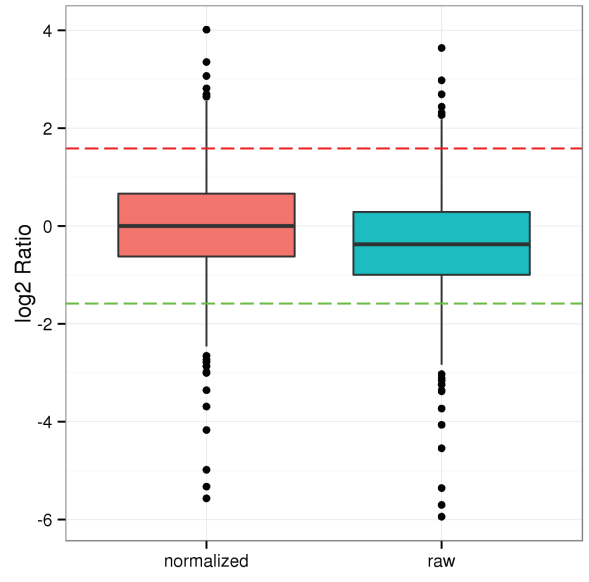

Supplement: supp_M112.027052_mcp.M112.027052-4.pdf [file supp_M112.027052_mcp.M112.027052-4.pdf]
