# Supplementary material
Source: PubMed Central journal article supplement (PMC3734570)

a) CDK

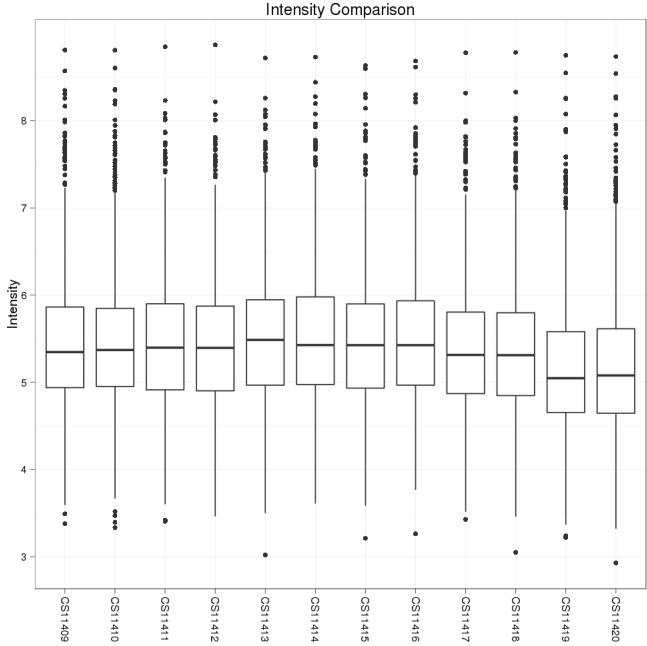

b) CK

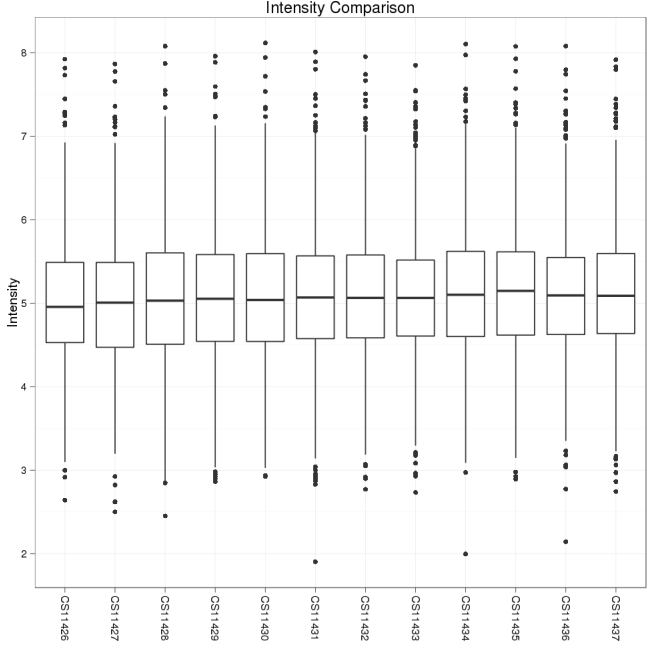

c) PKD

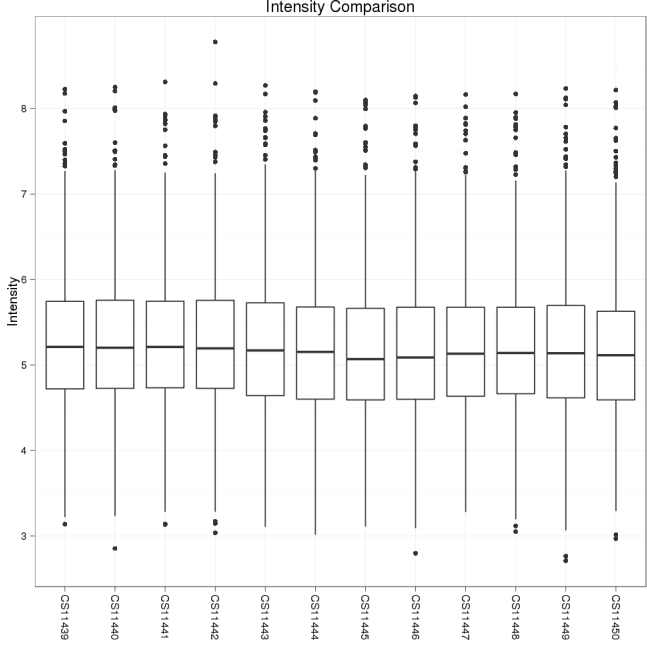

Supplement: supp_M112.027052_mcp.M112.027052-3.pdf [file supp_M112.027052_mcp.M112.027052-3.pdf]
